# Supplementary material for: Ontogenetic Changes in the Chemical Profiles of Piper Species
Source: MDPI journal article supplement (doi:10.3390/plants10061085), 2021-05-28
Supplement: s1 [file s1]

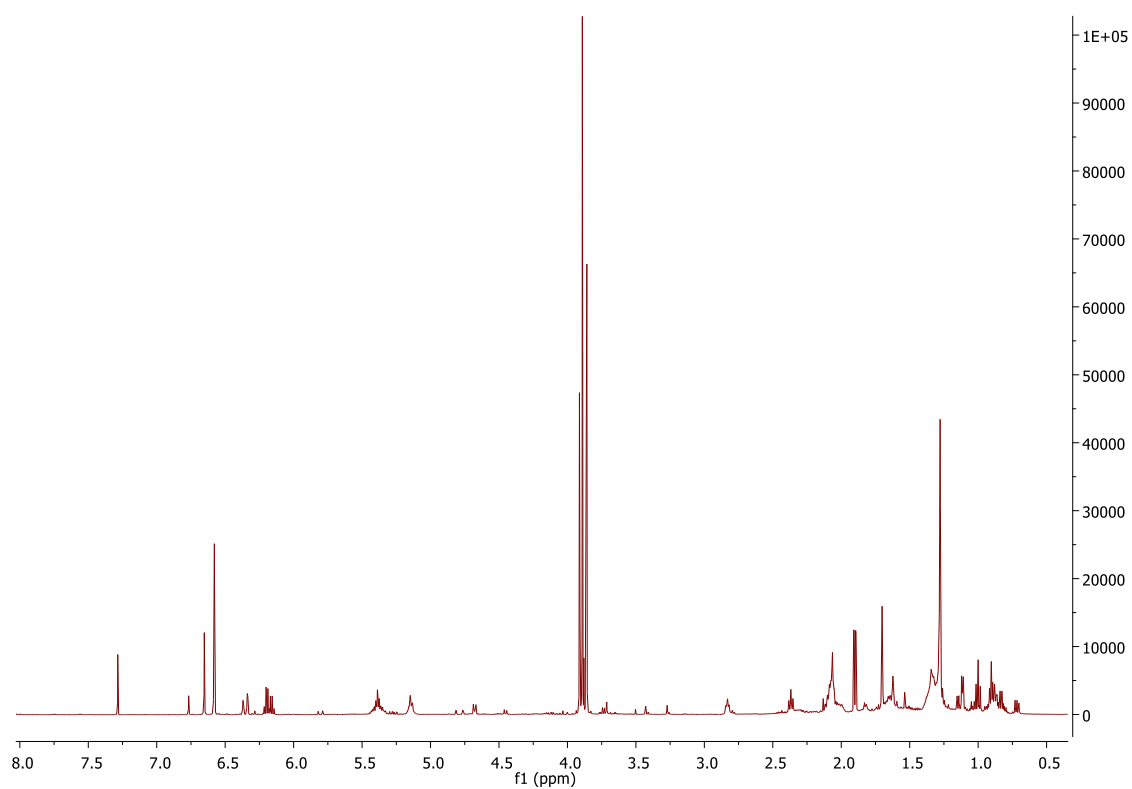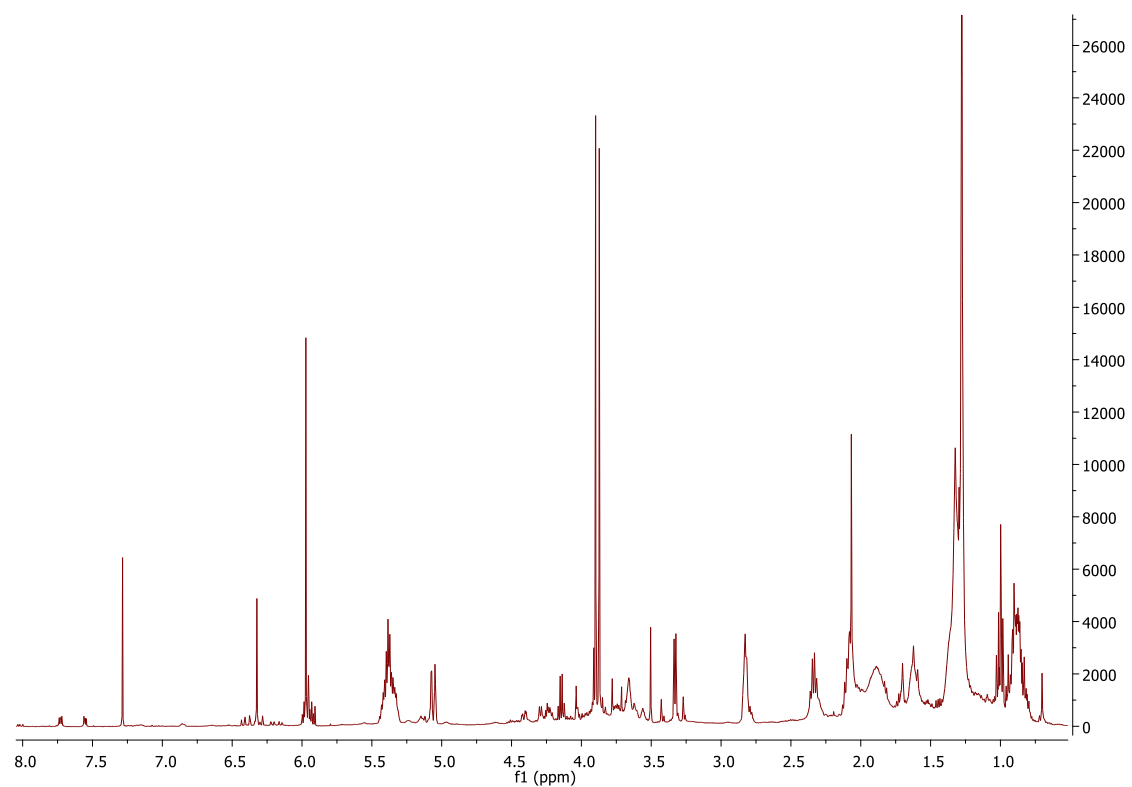

**Supplementary Figure S1.**  $^1\text{H}$  NMR (500 MHz,  $\text{CDCl}_3$ ) spectra of crude extracts from adult (top) and seedling (bottom) leaves of *P. solmsianum*.

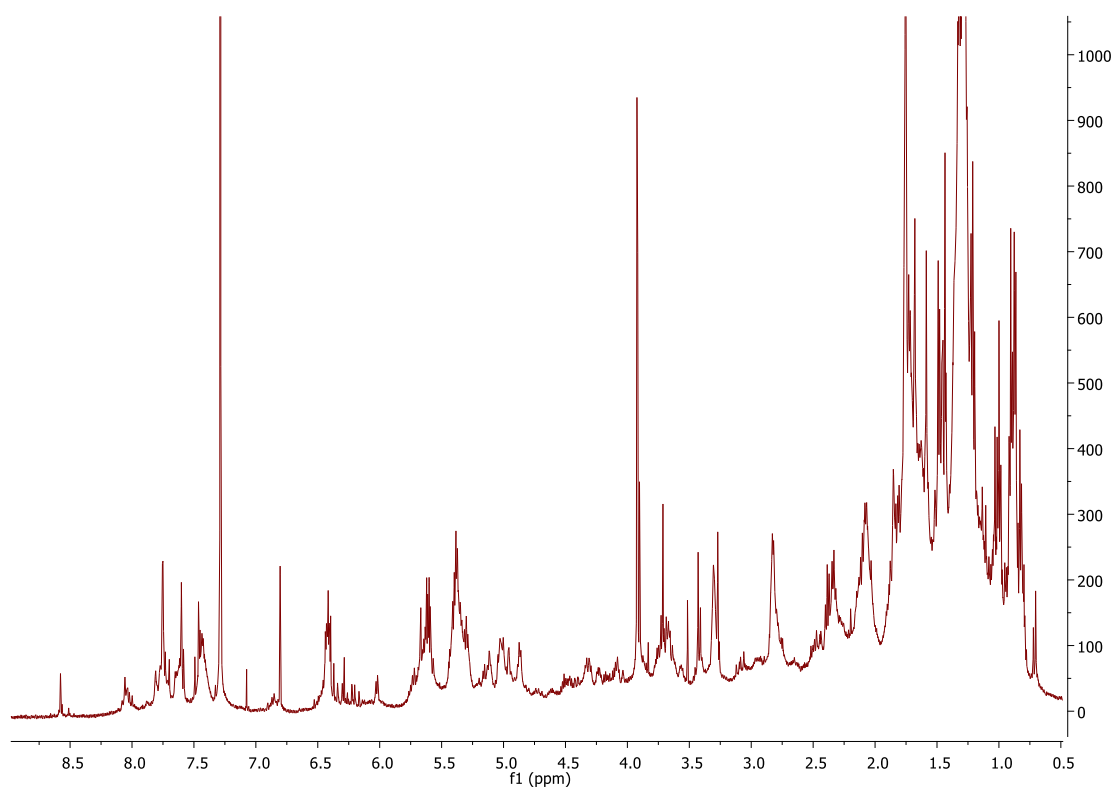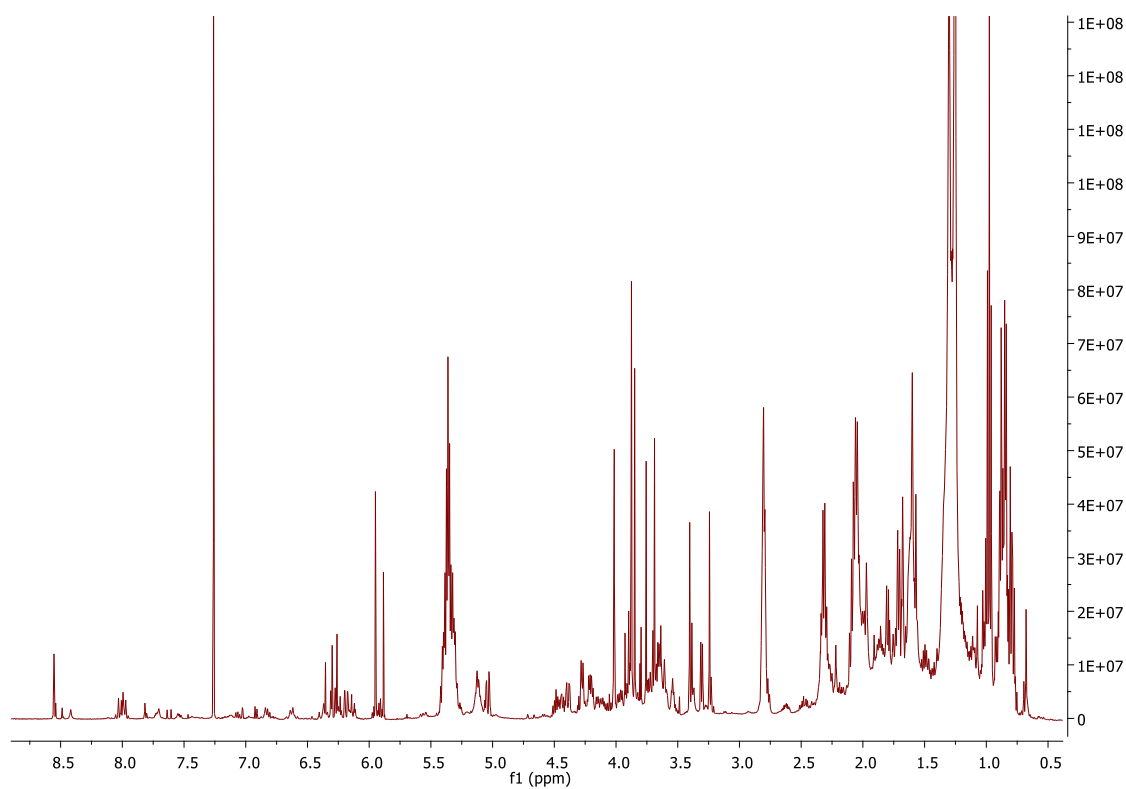

**Supplementary Figure S2.**  $^1\text{H}$  NMR (500 MHz,  $\text{CDCl}_3$ ) spectra of crude extracts from adult (top) and seedling (bottom) leaves of *P. gaudichaudianum*.

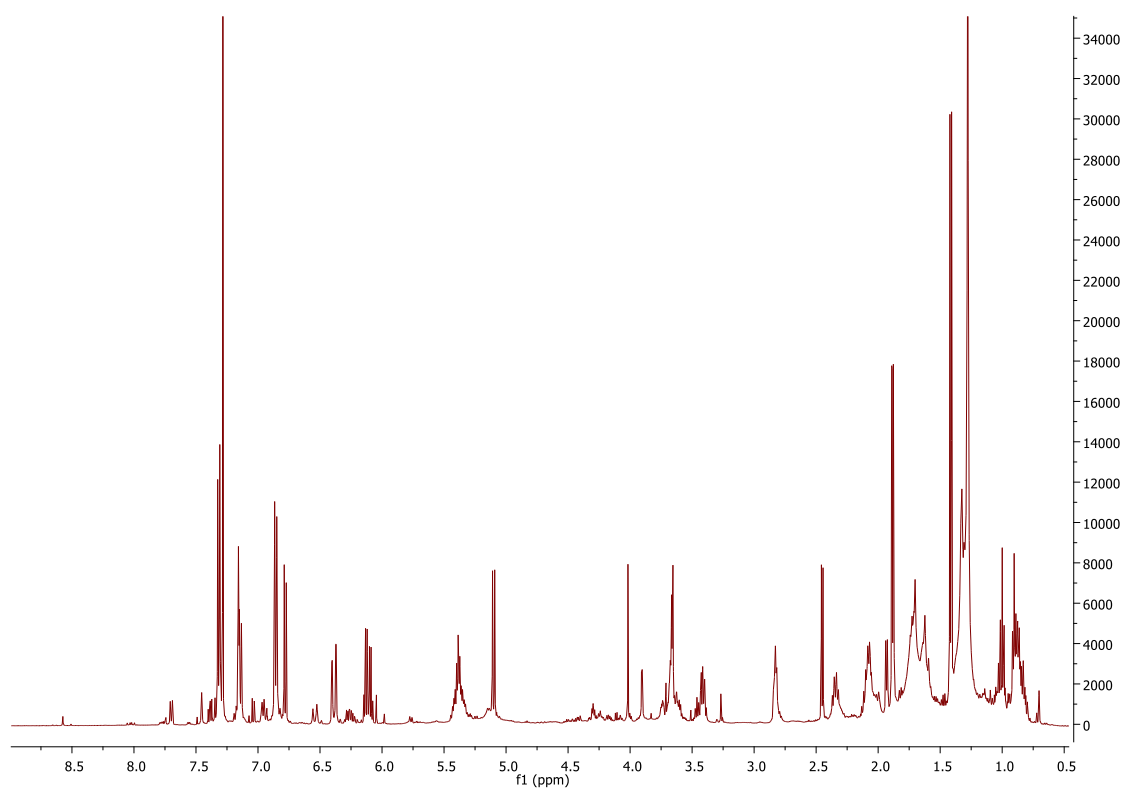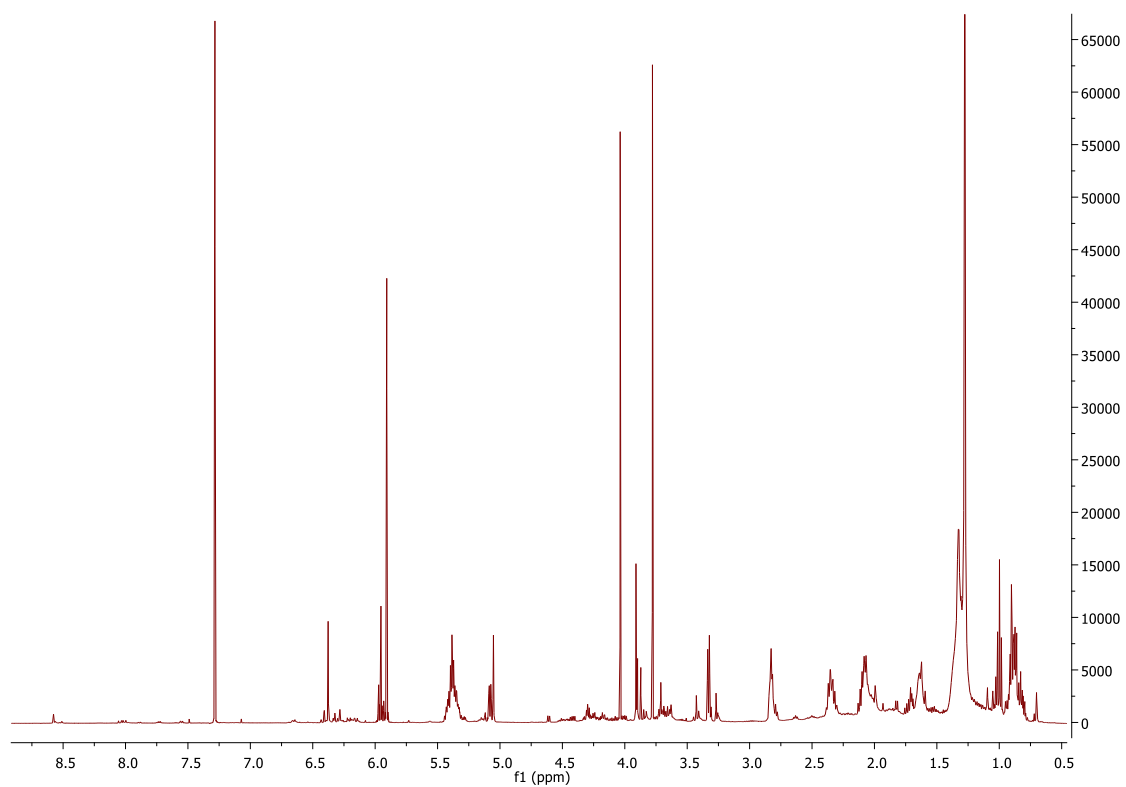

**Supplementary Figure S3.** <sup>1</sup>H NMR (500 MHz, CDCl<sub>3</sub>) spectra of crude extracts from adult (top) and seedling (bottom) leaves of *P. regnellii*.

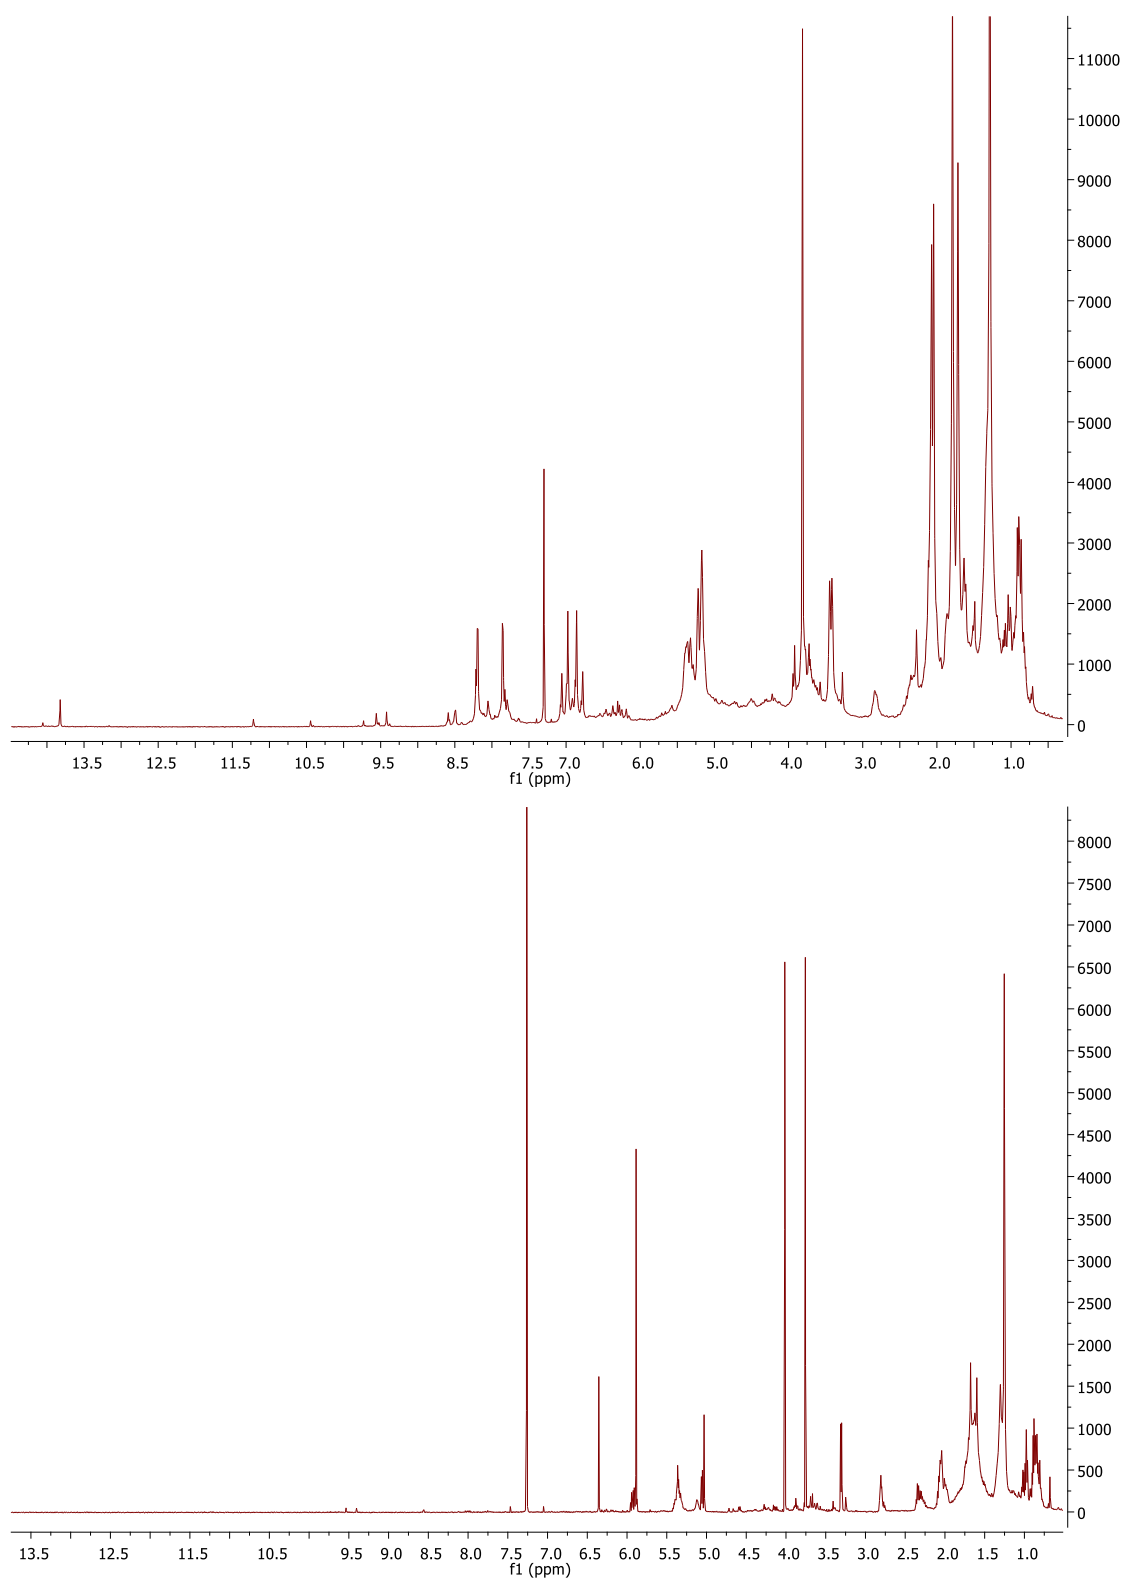

**Supplementary Figure S4.**  $^1\text{H}$  NMR (500 MHz,  $\text{CDCl}_3$ ) spectra of crude extracts from adult (top) and seedling (bottom) leaves of *P. hemmendorffii*.

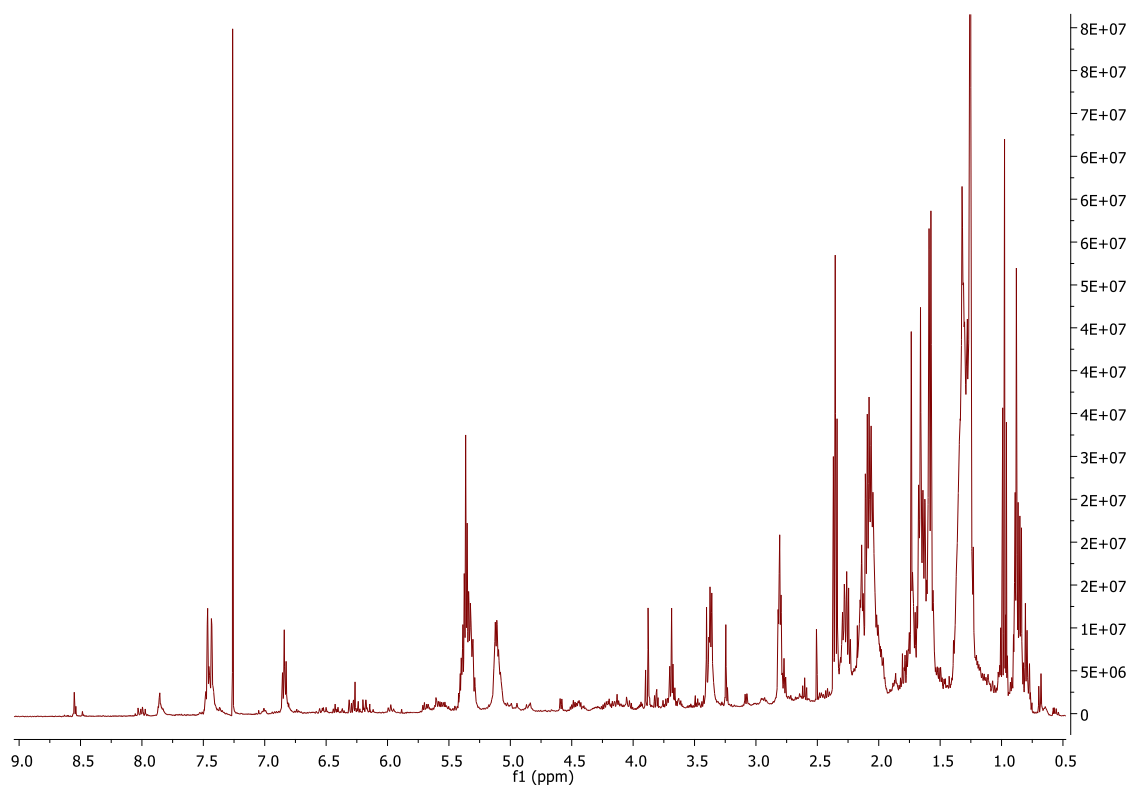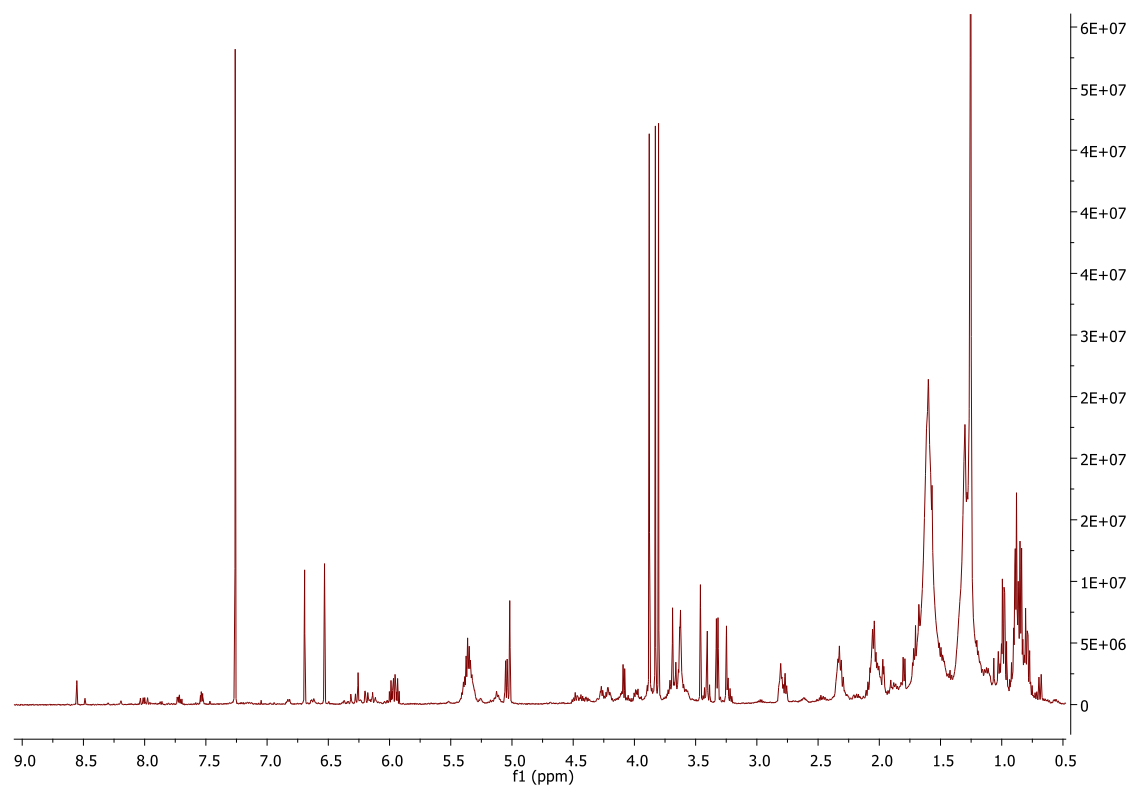

**Supplementary Figure S5.** <sup>1</sup>H NMR (500 MHz, CDCl<sub>3</sub>) spectra of crude extracts from adult (top) and seedling (bottom) leaves of *P. caldense*.

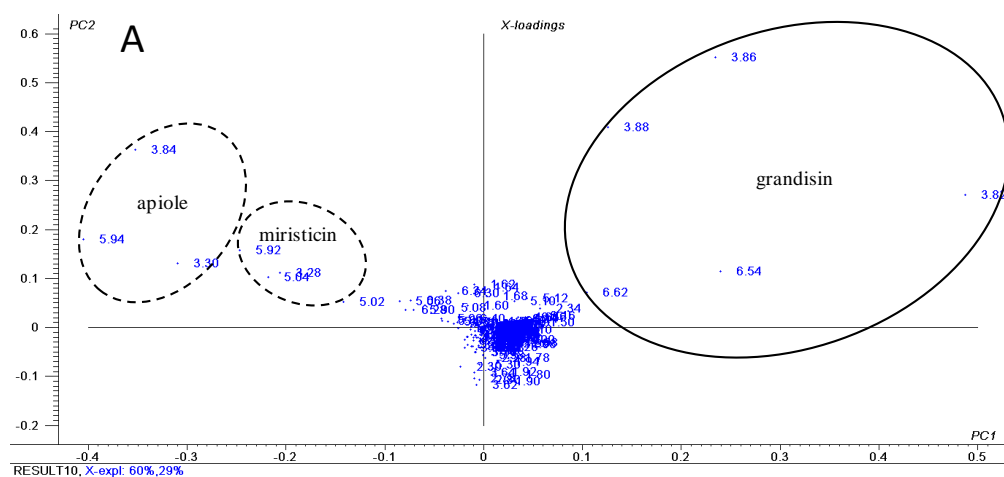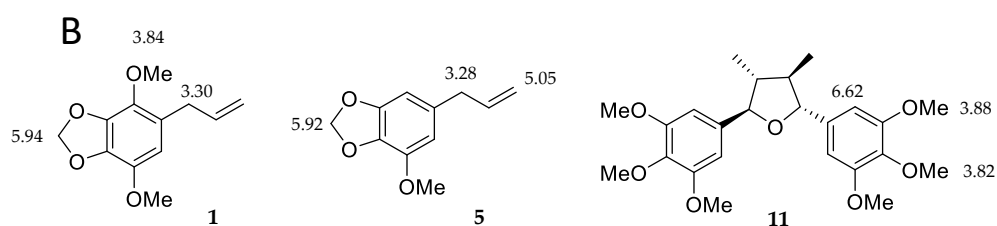

**Supplementary Figure S6.** Loading plot (A) obtained by PCA using  $^1\text{H}$  NMR data of crude extracts of seedling leaves (at 3, 6, 9, 12 and 15 months) and adult leaves of *P. solmsianum*. Chemical structures with assignments of chemical shifts (B) of apirole (1), myristicin (5) and grandisin (12) observed in their  $^1\text{H}$  NMR data.

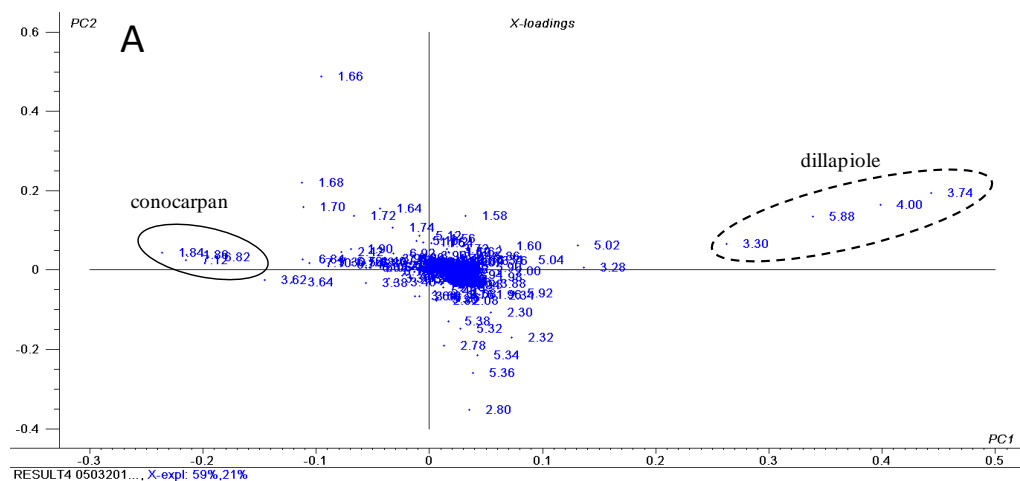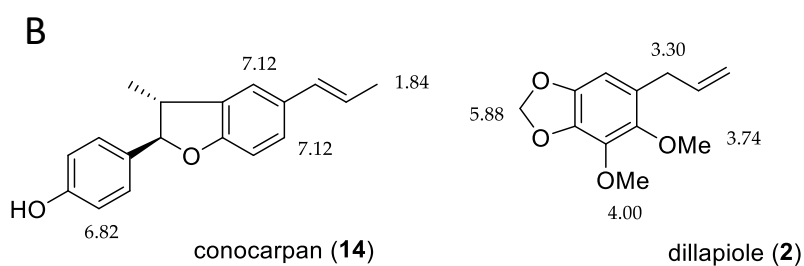

**Supplementary Figure S7.** Loading plot (A) obtained by PCA using NMR data of crude extracts of seedling leaves (seedlings at 3, 6, 9, 12 and 15 months) and adult leaves of *P. regnellii*. Chemical structures with assignments of chemical shifts (B) of conocarpan (**14**), and dillapiole (**2**) observed in their  $^1\text{H}$  NMR data.

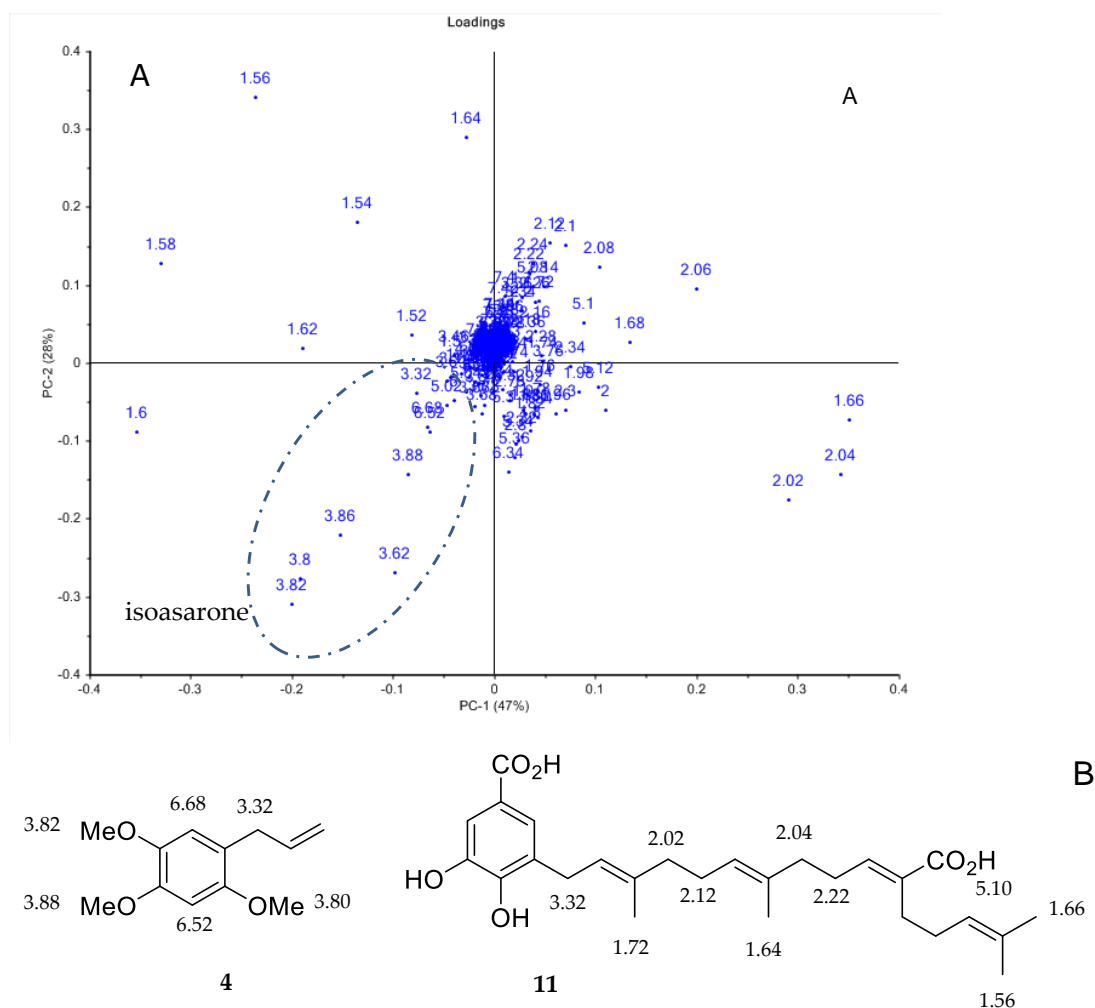



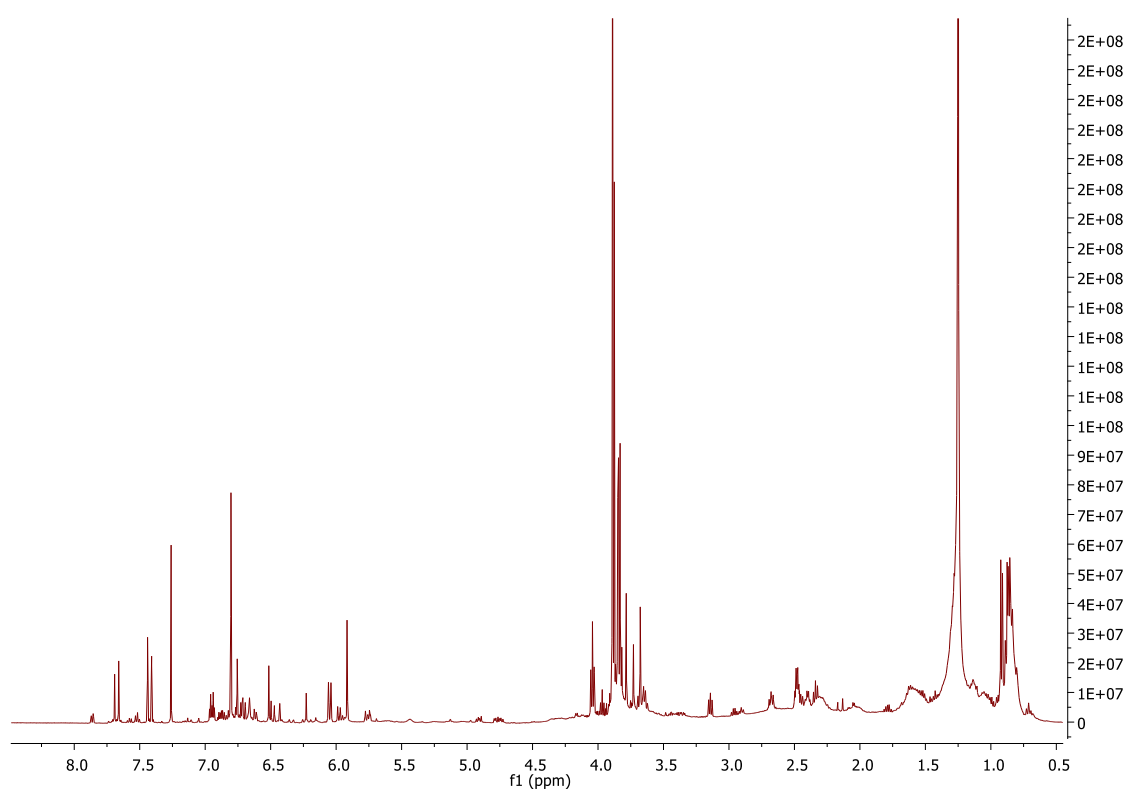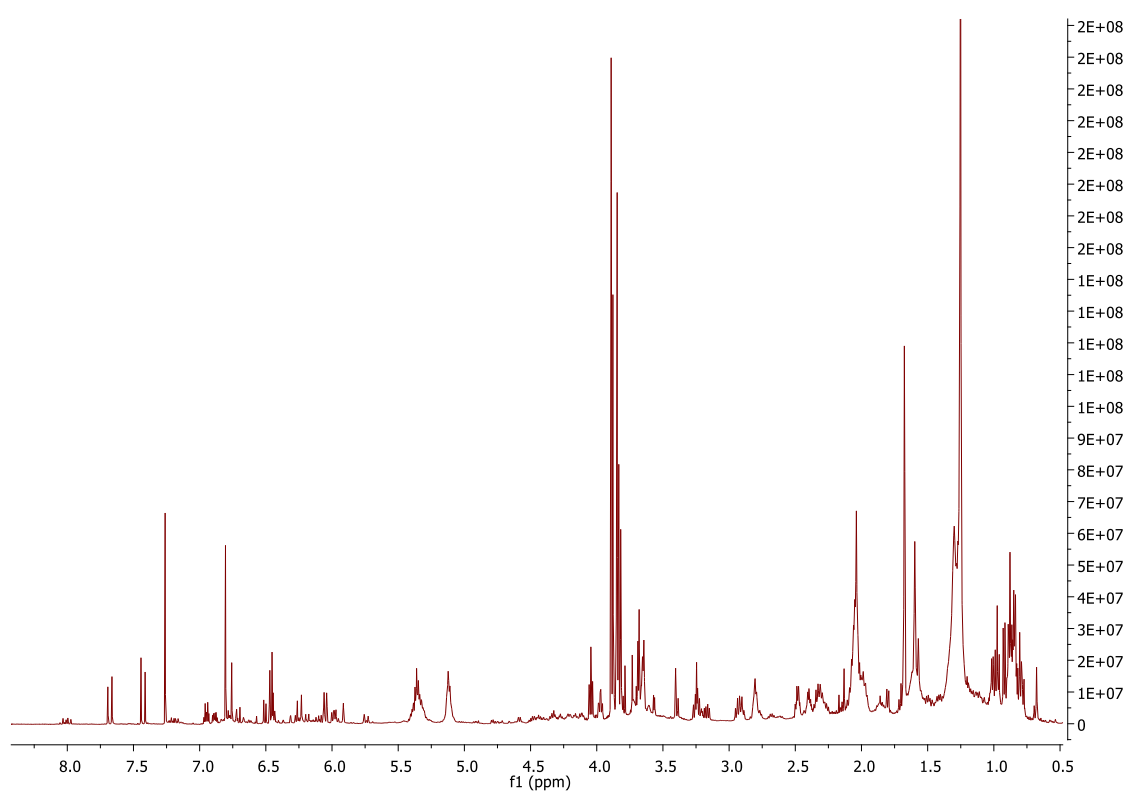

**Supplementary Figure S9.** <sup>1</sup>H NMR (500 MHz, CDCl<sub>3</sub>) spectra of crude extracts from adult (top) and seedling (bottom) leaves *P. tuberculatum*.

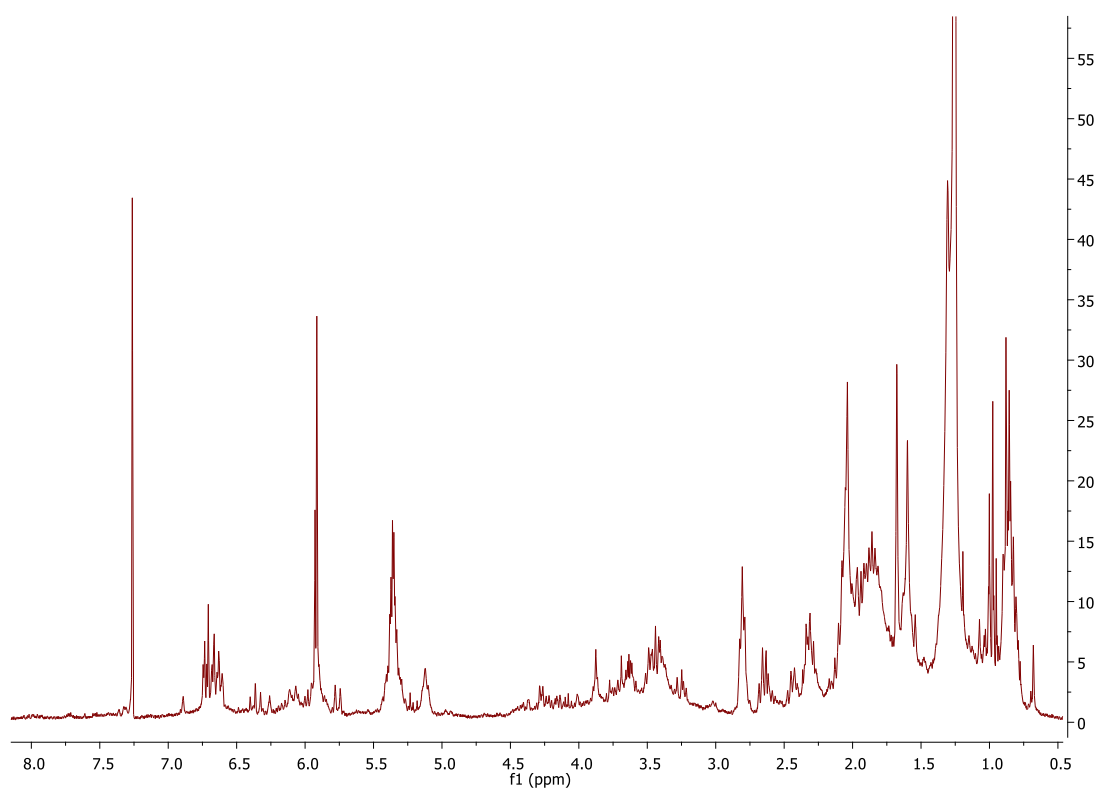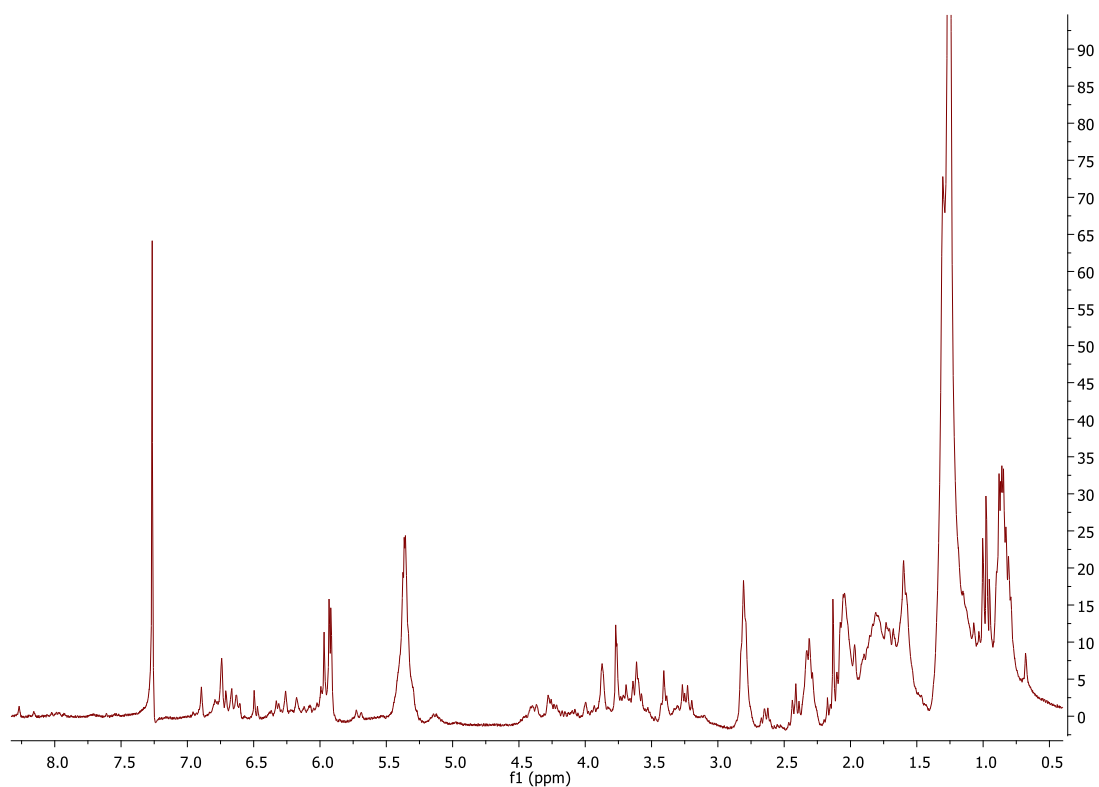

**Supplementary Figure S10.**  $^1\text{H}$  NMR (500 MHz,  $\text{CDCl}_3$ ) spectra of crude extracts from adult (top) and seedling (bottom) leaves of *P. amalago*.



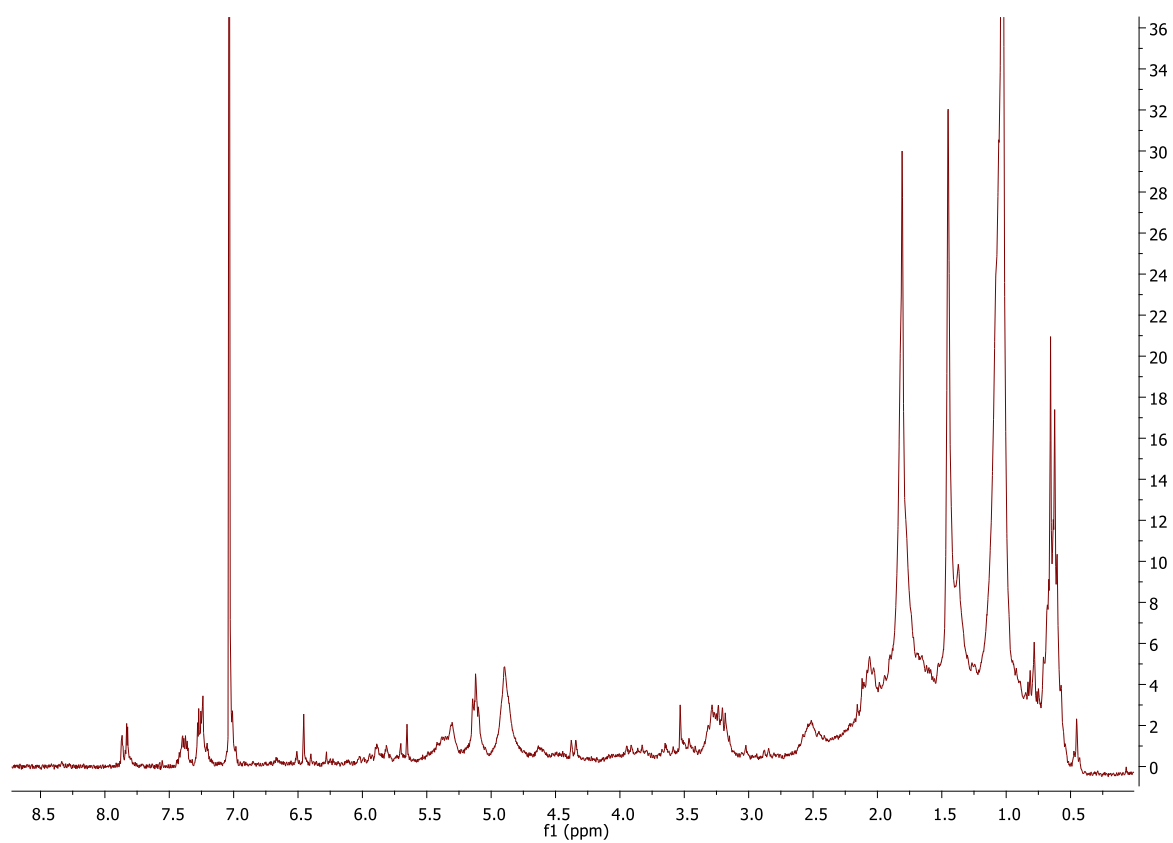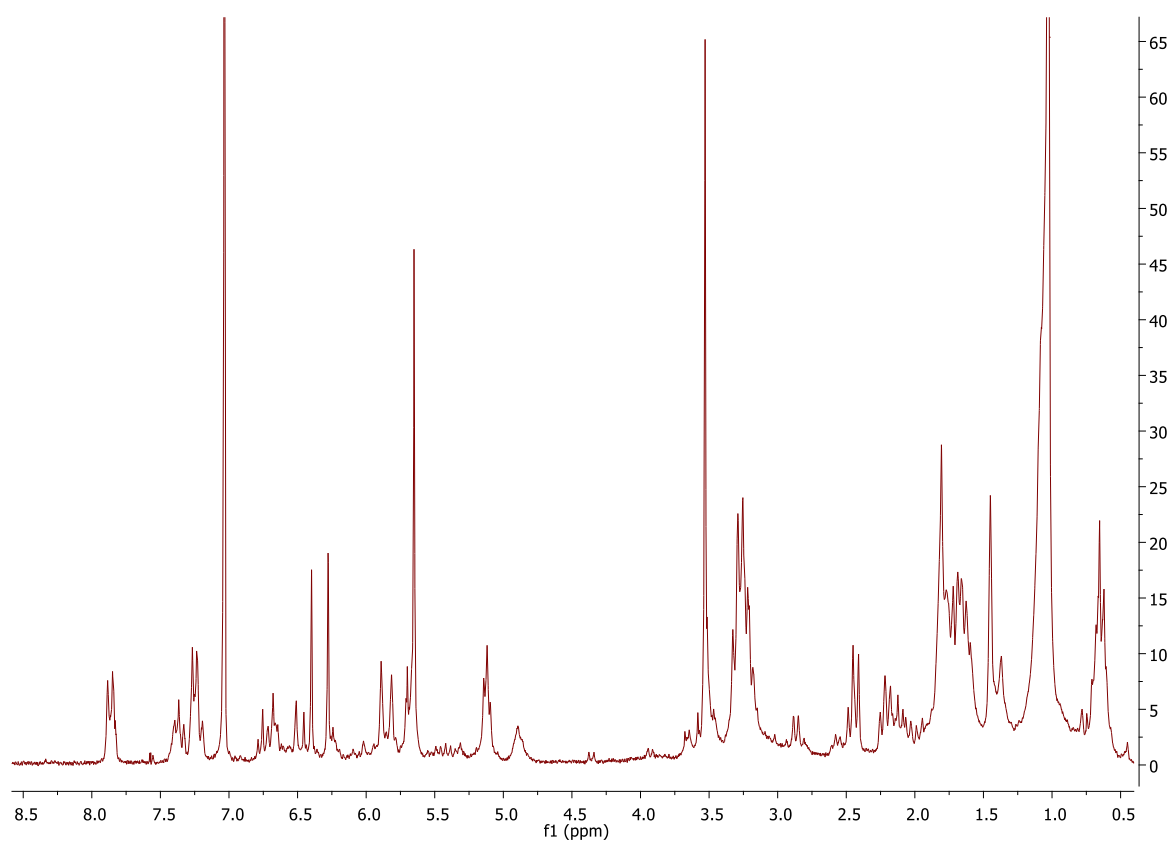

**Supplementary Figure S12.**  $^1\text{H}$  NMR (500 MHz,  $\text{CDCl}_3$ ) spectrum of crude extracts from adult (top) and seedling (bottom) leaves of *P. reticulatum*.

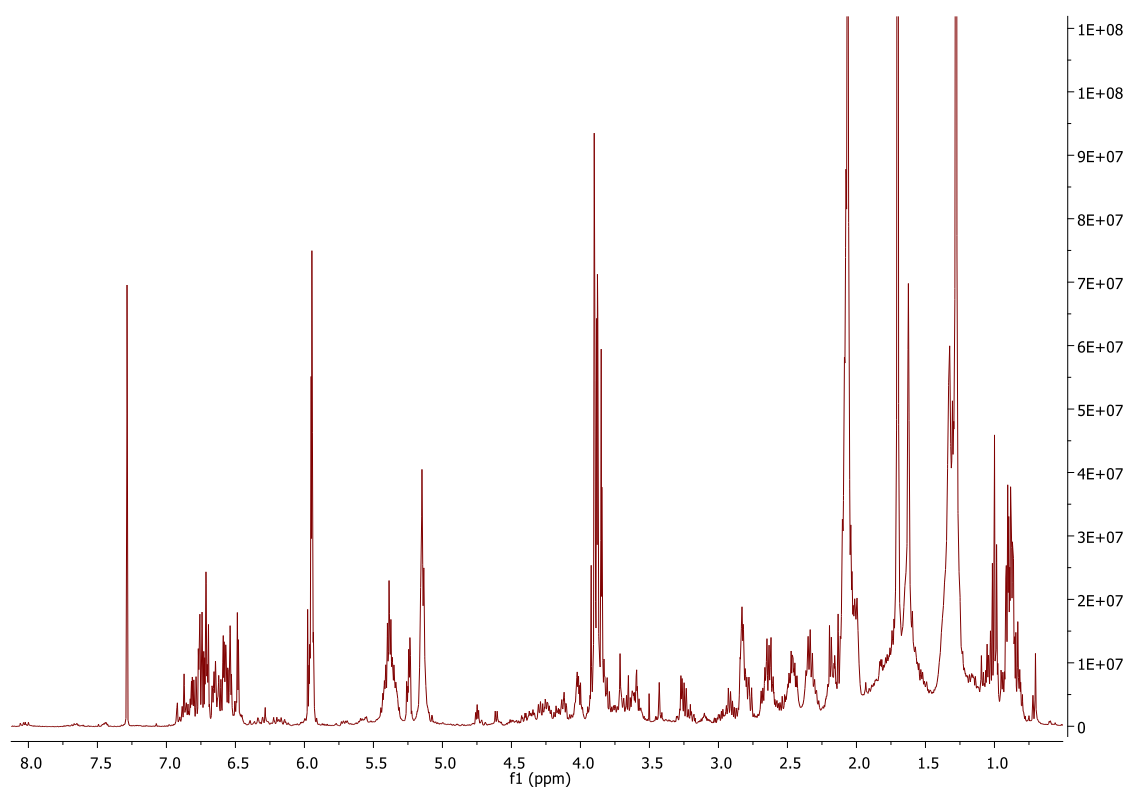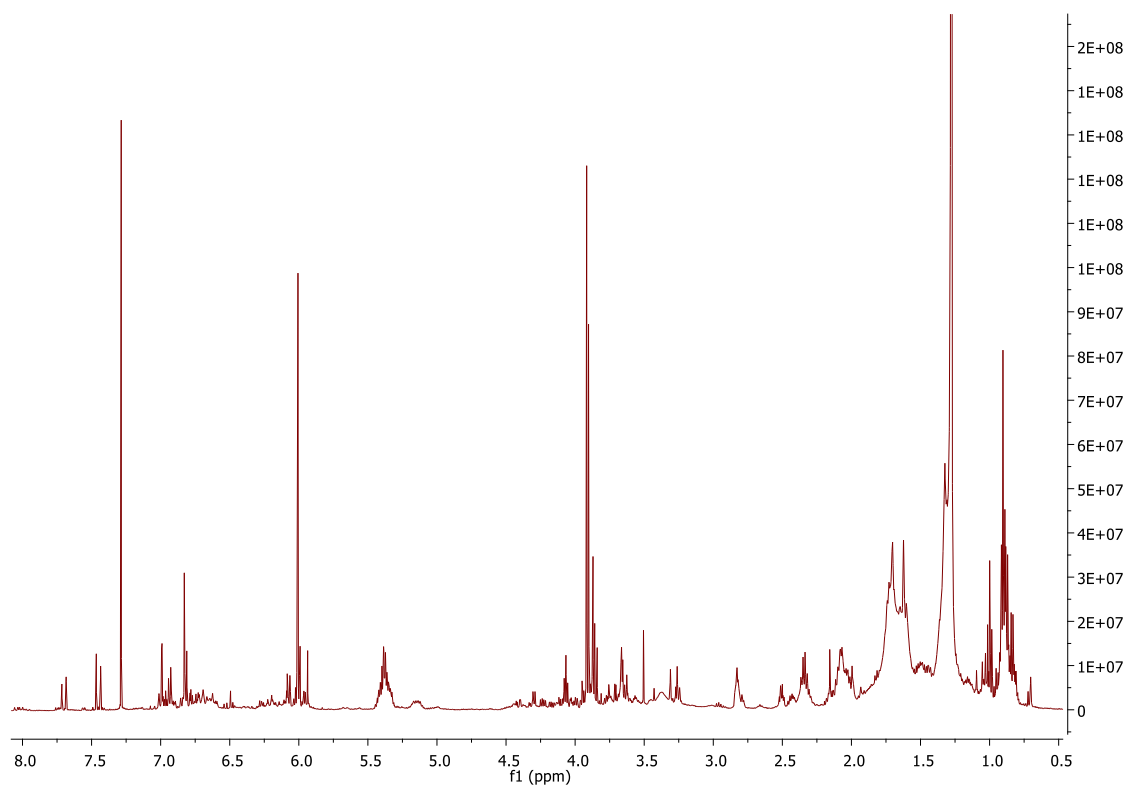

**Supplementary Figure S13.**  $^1\text{H}$  NMR (500 MHz,  $\text{CDCl}_3$ ) spectra of crude extracts from adult (top) and seedling (bottom) leaves of *P. richardiaefolium*.

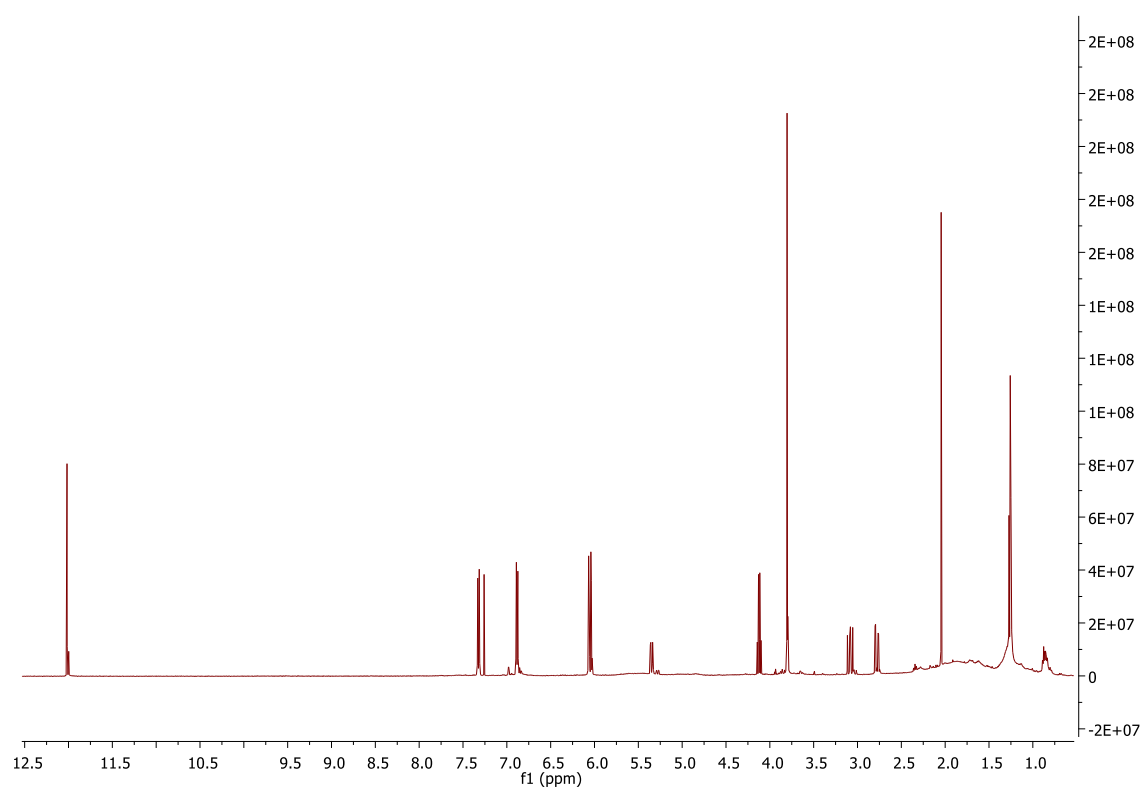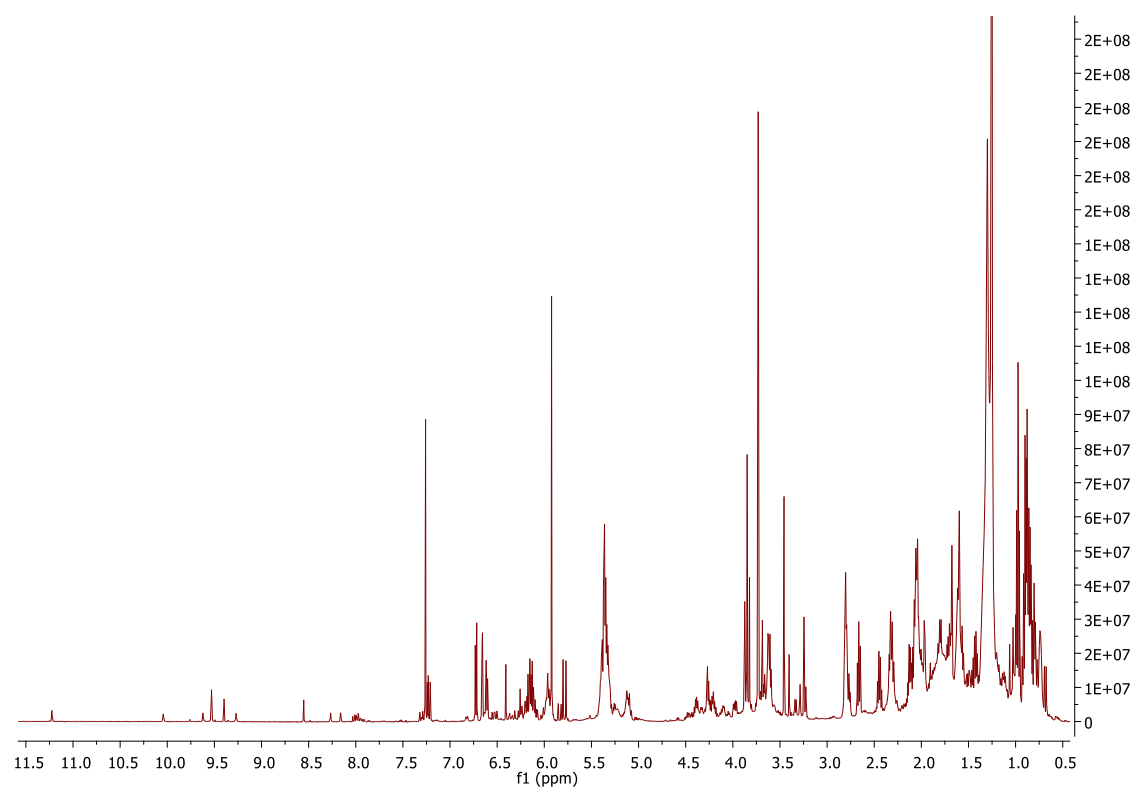

**Supplementary Figure S14.**  $^1\text{H}$  NMR (500 MHz,  $\text{CDCl}_3$ ) spectra of crude extracts from adult (top) and seedling (bottom) leaves of *P. permucronatum*.

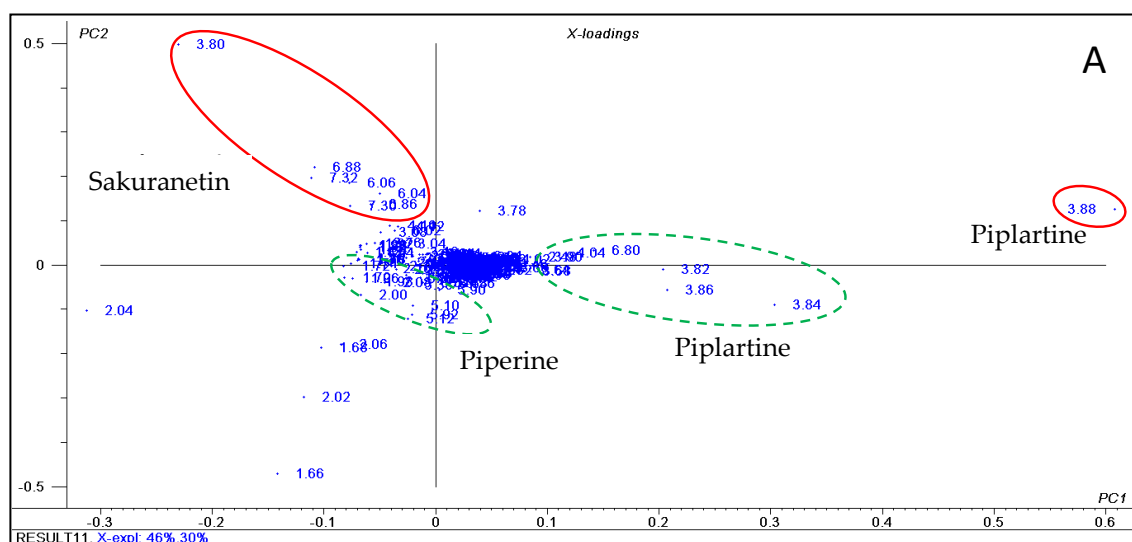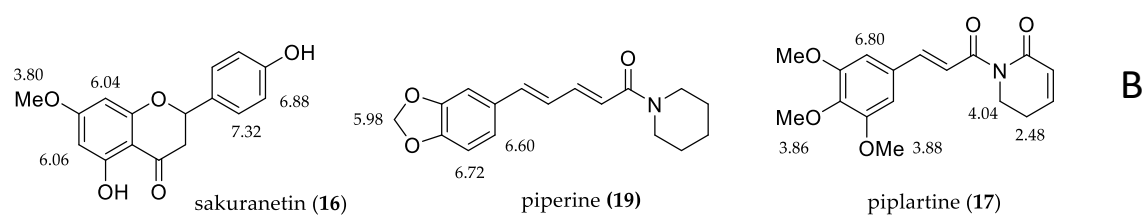

**Supplementary Figure S15.** Loadings (A) of the analysis of main components of the  $^1\text{H}$  NMR data of the adult and seedling leaves of *P. permucronatum*, *P. richardiaefolium* and *P. tuberculatum*. Chemical structures and assignment (B) of the main  $^1\text{H}$  NMR chemical shifts of sakuranetin (16), piperine (19) and piplartine (17).

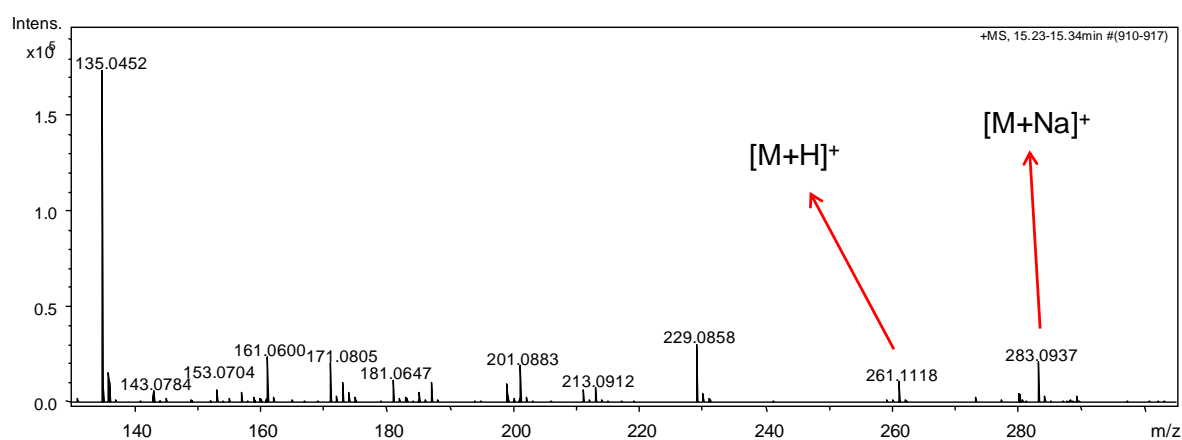

**Supplementary Figure S16.** HRESIMS spectrum of compound 23 isolated from seedling leaves of *P. permucronatum*.

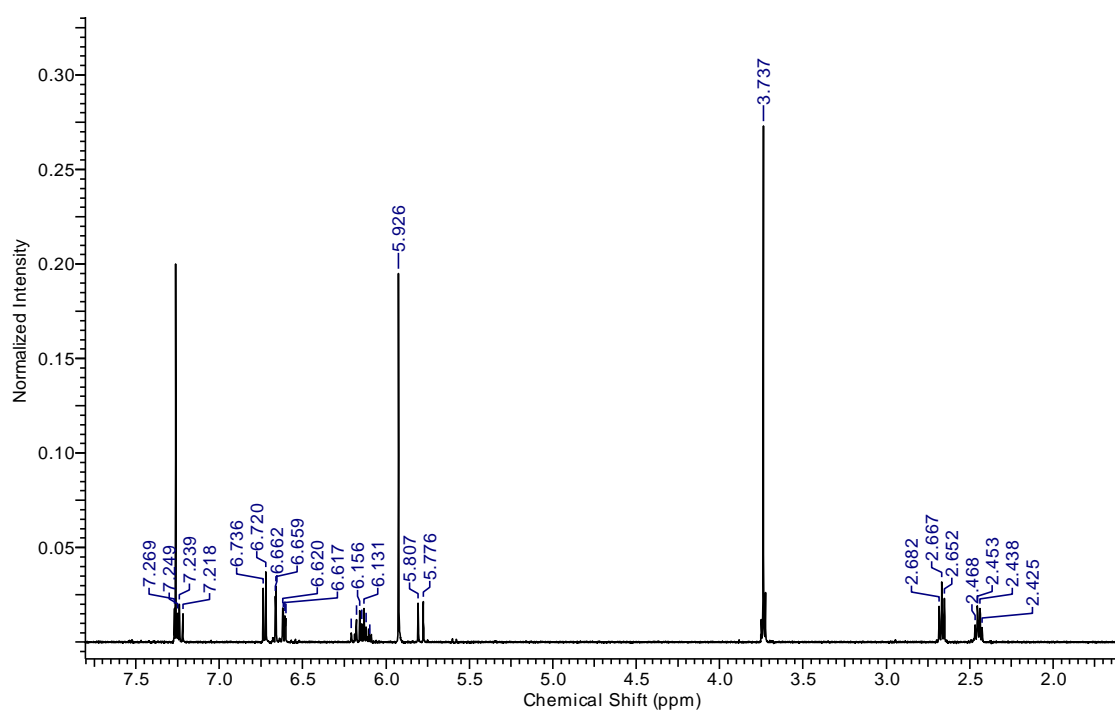

**Supplementary Figure S17.** <sup>1</sup>H NMR (500 MHz, CDCl<sub>3</sub>) spectrum of compound **23** isolated from seedling leaves of *P. permucronatum*.

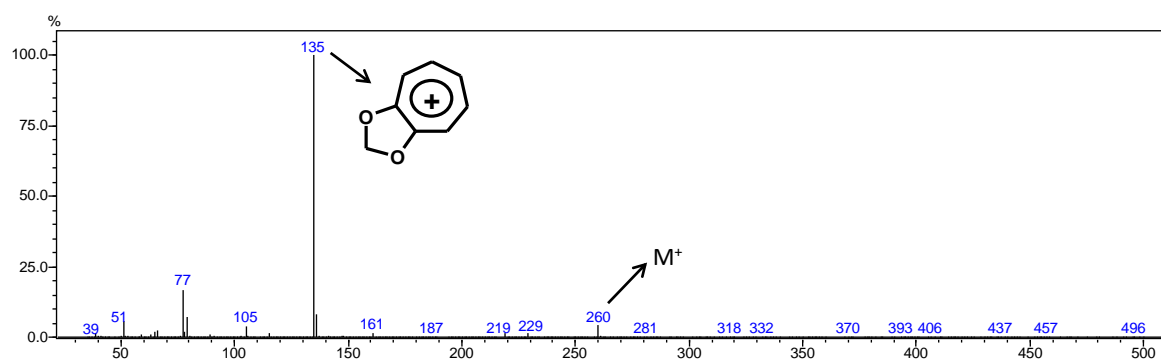

**Supplementary Figure S18.** EIMS spectrum of compound **23** isolated from seedling leaves of *P. permucronatum*.



**Table S1.**  $^1\text{H}$  and  $^{13}\text{C}$  NMR data for compound **23** isolated from seedlings leaves of *P. permucronatum*.

| Position             | $\delta$ $^1\text{H}$ , (J in Hz) | $\delta$ $^{13}\text{C}$ |
|----------------------|-----------------------------------|--------------------------|
| 1                    | -                                 | 134.9                    |
| 2                    | 6.66 (1H, d, 1.5)                 | 108.8                    |
| 3                    | -                                 | 147.4                    |
| 4                    | -                                 | 146.1                    |
| 5                    | 6.73 (1H, d, 8.0)                 | 108.2                    |
| 6                    | 6.61 (1H, dd, 8.0 and 1.5)        | 121.2                    |
| 7                    | 2.67 (2H, t, 7.5)                 | 34.8                     |
| 8                    | 2.44 (2H, m)                      | 35.0                     |
| 9                    | 6.14 (1H, m)                      | 143.2                    |
| 10                   | 6.14 (1H, m)                      | 129.0                    |
| 11                   | 7.25 (1H, dd, 15.0 and 10.0)      | 145.7                    |
| 12                   | 5.79 (1H, d, 15.0)                | 119.2                    |
| 13                   | -                                 | 167.2                    |
| 13-OMe               | 3.73 (3H, s)                      | 51.5                     |
| O-CH <sub>2</sub> -O | 5.93 (2H, s)                      | 100.8                    |

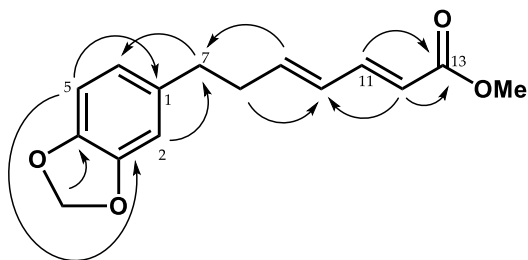

**Figure S19.** HMBC correlations observed for compound **23**.
